# Supplementary material for: F-Box/WD Repeat Domain-Containing 7 Induces Chemotherapy Resistance in Colorectal Cancer Stem Cells
Source: MDPI journal article supplement (doi:10.3390/cancers11050635), 2019-05-07
Supplement: s1 [file Table S1.xlsx]

## Sheet: Sheet1
		Supplementary Table 1. List of primer sequences.
		FBXW7	Fw	5’-CGTTG CAGGG GCATA CTAAT-3’
			Rv	5’-ATGCAATTCCCTGTCTCCAC-3’
		BMI1	Fw	5’-TCATCCTTCTGCTGATGCTG-3’
			Rv	5’-CCGATCCAATCTGTTCTGGT-3’
		LGR5	Fw	5’-AGGTTGTTGGGGGAATTAGG-3’
			Rv	5’-TTCTGAGGAAAGGCAAAGGA-3’
		ACTB	Fw	5’-GCAAAGACCTGTACGCCAAC-3’
			Rv	5’-ACATCTGCTGGAAGGTGGAC-3’
